# Supplementary material for: An unprecedented ι-type octamolybdate: [TbI1]2[(β-Mo8O26)0.5(ι-Mo8O26)] directed by a new tricationic template
Source: Royal Society of Chemistry journal article supplement (doi:10.1039/c3ce41418c), 2013-01-01
Supplement: c3ce41418c.pdf [file c3ce41418c.pdf]

Supplementary material for

**An unprecedented  $\iota$ -type octamolybdate:  $[\text{TbI}_1]_2[(\beta\text{-Mo}_8\text{O}_{26})_{0.5}(\iota\text{-Mo}_8\text{O}_{26})]$  directed by a new tricationic template**

**Zhong-Cheng Yue,<sup>a</sup> Hai-Juan Du,<sup>a</sup> Yun-Yin Niu<sup>a,b,\*</sup> and Guo-Xin Jin<sup>c</sup>**

<sup>a</sup>*College of Chemistry and Molecular Engineering, Zhengzhou University, Zhengzhou 450001, P. R. China. Email: niuyy@zzu.edu.cn*

<sup>b</sup>*State Key Lab of Coordination Chemistry, Nanjing University, Nanjing 210093, P. R. China.*

<sup>c</sup>*Department of Chemistry, Advanced Materials Laboratory, Fudan University, Shanghai 200433, P. R. China.*

## **Experimental details**

The IR spectra were recorded on a Shimadzu IR435 spectrometer as KBr disk (4000–400  $\text{cm}^{-1}$ ). The purity of the bulk microcrystalline materials obtained from the syntheses was checked by Powder X-ray diffraction analysis. XRPD patterns were recorded using Cu  $\text{K}\alpha_1$  radiation on a PAN analytical X'Pert PRO diffractometer. Electrochemical measurements were performed with a CHI660b electrochemical workstation. A conventional three-electrode system was used. Ag/AgCl (3 M KCl) electrode was used as a reference electrode, and a Pt wire as a counter electrode. Chemically bulk-modified carbon-paste electrodes (CPEs) were used as the working electrodes.

Crystallographic data for the compound **1** was collected at 100(2)K on a Bruker APEX-II area-detector diffractometer equipped with graphite-monochromatized Mo-K $\alpha$  radiation ( $\lambda = 0.71073\text{\AA}$ ). The structure was solved by direct method and expanded using Fourier techniques. The non-hydrogen atoms were refined with anisotropic thermal parameters. The hydrogen atoms were assigned with common isotropic displacement factors and included in the final refinement by using

geometrical constraint. The structure was refined with full-matrix least-squares techniques on  $F^2$  using the SHELXTL-97 program package.

General method: Reagents and solvents for the syntheses were purchased from commercial sources and used without further purification. The tricationic  $TbI_1^{3+}$  was prepared as described in the literature (T. Fahlbusch, *et al*, *Eur. J. Org. Chem.*, 2006, 1899.)

Synthesis of compound  $[TbI_1]_2[(\beta-Mo_8O_{26})_{0.5}(\tau-Mo_8O_{26})]$  (**1**): A mixture of  $(NH_4)_6Mo_7O_{24}\cdot 4H_2O$  (0.05 mmol),  $TbI_1\cdot Br_3$  (0.05 mmol), and  $H_2O$  (10 mL) was stirred at room temperature until it was homogeneous, and adjusted by  $CH_3COOH$  to  $pH=4$ . Then the mixture was sealed in an 18 mL Teflon-lined stainless steel container, which was heated to  $155^\circ C$  under autogenously pressure for 4d. After slow cooling to room temperature with the rate  $10^\circ C\cdot h^{-1}$ , the colorless, bulk crystals were formed. The products are not soluble in common solvents. IR (KBr,  $cm^{-1}$ ): 3444 (m), 3093 (s), 1581 (w), 1561 (s), 1443 (s), 1383 (w), 1357 (m), 1326 (s), 1253 (w), 1172 (s), 1148 (s), 1024 (w), 946 (s), 912 (s), 865 (w), 839 (m), 791(m), 745 (s), 654 (s), 613 (s), 556(s), 518(m).

**Table S1.** Selected bond distances(Å) and angles(°)for compound **1**

| Compound <b>1</b> |          |         |          |
|-------------------|----------|---------|----------|
| Mo1—O4            | 1.689(4) | Mo7—O27 | 1.689(4) |
| Mo1—O13           | 1.740(4) | Mo7—O16 | 1.705(4) |
| Mo1—O3            | 1.934(4) | Mo7—O21 | 1.921(4) |
| Mo1—O5            | 1.959(4) | Mo7—O14 | 1.934(4) |
| Mo1—O11           | 2.377(3) | Mo7—O19 | 2.305(4) |
| Mo2—O25           | 1.695(4) | Mo7—O17 | 2.385(4) |
| Mo2—O29           | 1.746(4) | Mo8—O23 | 1.703(5) |
| Mo2—O15           | 1.798(4) | Mo8—O37 | 1.707(4) |
| Mo2—O17           | 1.809(4) | Mo8—O32 | 1.810(4) |
| Mo3—O28           | 1.691(4) | Mo8—O35 | 1.828(4) |
| Mo3—O24           | 1.701(4) | Mo9—O26 | 1.705(4) |

|             |            |              |            |
|-------------|------------|--------------|------------|
| Mo3—O14     | 1.894(4)   | Mo9—O22      | 1.705(4)   |
| Mo3—O35     | 1.977(4)   | Mo9—O30      | 1.891(4)   |
| Mo3—O17     | 2.317(4)   | Mo9—O21      | 1.907(4)   |
| Mo3—O18     | 2.318(4)   | Mo9—O19      | 2.427(4)   |
| Mo4—O34     | 1.697(4)   | Mo9—O15      | 2.428(4)   |
| Mo4—O18     | 1.748(4)   | Mo10—O39     | 1.685(4)   |
| Mo4—O19     | 1.803(4)   | Mo10—O33     | 1.703(4)   |
| Mo4—O20     | 1.811(4)   | Mo10—O31     | 1.930(4)   |
| Mo5—O1      | 1.696(4)   | Mo10—O30     | 1.956(4)   |
| Mo5—O2      | 1.705(4)   | Mo10—O15     | 2.314(4)   |
| Mo5—O12     | 1.898(4)   | Mo10—O20     | 2.389(4)   |
| Mo5—O3      | 2.356(4)   | Mo11—O36     | 1.684(4)   |
| Mo5—O11     | 2.369(4)   | Mo11—O38     | 1.697(5)   |
| Mo6—O7      | 1.697(4)   | Mo11—O31     | 1.889(4)   |
| Mo6—O6      | 1.706(4)   | Mo11—O32     | 1.996(4)   |
| Mo6—O10     | 1.894(4)   | Mo11—O29     | 2.322(4)   |
| Mo6—O11     | 2.287(4)   | Mo11—O20     | 2.341(4)   |
| Mo6—O5      | 2.356(4)   | Mo12—O8      | 1.697(4)   |
| Mo12—O10    | 1.926(4)   | Mo12—O9      | 1.700(4)   |
| Mo12—O13    | 2.284(4)   | Mo12—O12     | 1.925(4)   |
| Mo12—O11    | 2.489(3)   | Mo1—O3—Mo5   | 111.54(15) |
| O4—Mo1—O13  | 104.16(18) | Mo1—O5—Mo6   | 108.70(16) |
| O4—Mo1—O3   | 102.43(17) | Mo6—O10—Mo12 | 117.4(2)   |
| O13—Mo1—O3  | 97.56(17)  | Mo6—O11—Mo5  | 163.20(17) |
| O4—Mo1—O5   | 99.98(17)  | Mo6—O11—Mo1  | 97.75(14)  |
| O13—Mo1—O5  | 95.88(17)  | Mo5—O11—Mo1  | 97.00(12)  |
| O3—Mo1—O5   | 150.09(15) | Mo6—O11—Mo12 | 86.10(12)  |
| O4—Mo1—O11  | 175.04(16) | Mo5—O11—Mo12 | 85.56(11)  |
| O13—Mo1—O11 | 80.65(15)  | Mo1—O11—Mo12 | 91.26(12)  |

|             |            |               |            |
|-------------|------------|---------------|------------|
| O3—Mo1—O11  | 77.90(14)  | Mo5—O12—Mo12  | 119.36(19) |
| O5—Mo1—O11  | 78.10(14)  | Mo1—O13—Mo12  | 119.08(19) |
| O25—Mo2—O29 | 108.9(2)   | Mo3—O14—Mo7   | 119.21(19) |
| O25—Mo2—O15 | 109.12(18) | Mo2—O15—Mo10  | 129.12(19) |
| O29—Mo2—O15 | 110.37(17) | Mo2—O15—Mo9   | 123.67(19) |
| O25—Mo2—O17 | 107.74(19) | Mo10—O15—Mo9  | 89.90(13)  |
| O29—Mo2—O17 | 108.60(18) | Mo2—O17—Mo3   | 147.6(2)   |
| O15—Mo2—O17 | 112.01(18) | Mo2—O17—Mo7   | 122.97(17) |
| O28—Mo3—O24 | 103.67(18) | Mo3—O17—Mo7   | 89.21(13)  |
| O28—Mo3—O14 | 100.83(19) | Mo4—O18—Mo3   | 124.92(19) |
| O24—Mo3—O14 | 99.65(18)  | Mo4—O19—Mo7   | 129.98(19) |
| O28—Mo3—O35 | 100.54(18) | Mo4—O19—Mo9   | 123.20(19) |
| O24—Mo3—O35 | 94.49(18)  | Mo7—O19—Mo9   | 89.55(13)  |
| O14—Mo3—O35 | 150.71(16) | Mo4—O20—Mo11  | 147.3(2)   |
| O28—Mo3—O17 | 166.81(17) | Mo4—O20—Mo10  | 123.09(19) |
| O24—Mo3—O17 | 89.35(16)  | Mo11—O20—Mo10 | 89.59(13)  |
| O14—Mo3—O17 | 74.50(15)  | Mo9—O21—Mo7   | 121.1(2)   |
| O35—Mo3—O17 | 80.18(15)  | Mo2—O29—Mo11  | 126.2(2)   |
| O28—Mo3—O18 | 89.53(17)  | Mo9—O30—Mo10  | 121.2(2)   |
| O24—Mo3—O18 | 166.40(16) | Mo11—O31—Mo10 | 121.6(2)   |
| O14—Mo3—O18 | 80.74(15)  | Mo8—O32—Mo11  | 144.0(2)   |
| O35—Mo3—O18 | 79.64(15)  | Mo8—O35—Mo3   | 139.0(2)   |
| O17—Mo3—O18 | 77.60(13)  | O36—Mo11—O38  | 104.0(2)   |
| O34—Mo4—O18 | 109.1(2)   | O36—Mo11—O31  | 100.97(19) |
| O34—Mo4—O19 | 108.7(2)   | O38—Mo11—O31  | 100.8(2)   |
| O18—Mo4—O19 | 109.83(17) | O36—Mo11—O32  | 92.51(19)  |
| O34—Mo4—O20 | 108.7(2)   | O38—Mo11—O32  | 100.6(2)   |
| O18—Mo4—O20 | 108.54(18) | O31—Mo11—O32  | 151.03(17) |
| O19—Mo4—O20 | 111.87(18) | O36—Mo11—O29  | 167.4(2)   |

|             |            |              |            |
|-------------|------------|--------------|------------|
| O1—Mo5—O2   | 104.6(2)   | O38—Mo11—O29 | 87.45(18)  |
| O1—Mo5—O12  | 101.81(19) | O31—Mo11—O29 | 81.70(15)  |
| O2—Mo5—O12  | 100.62(19) | O32—Mo11—O29 | 79.98(16)  |
| O1—Mo5—O3   | 163.37(17) | O36—Mo11—O20 | 92.8(2)    |
| O2—Mo5—O3   | 89.76(18)  | O38—Mo11—O20 | 163.04(18) |
| O12—Mo5—O3  | 83.26(15)  | O31—Mo11—O20 | 73.40(15)  |
| O1—Mo5—O11  | 94.90(17)  | O32—Mo11—O20 | 80.50(16)  |
| O2—Mo5—O11  | 160.39(18) | O29—Mo11—O20 | 76.02(14)  |
| O12—Mo5—O11 | 76.64(14)  | O8—Mo12—O9   | 105.1(2)   |
| O3—Mo5—O11  | 70.65(12)  | O8—Mo12—O12  | 98.0(2)    |
| O7—Mo6—O6   | 104.5(2)   | O9—Mo12—O12  | 101.8(2)   |
| O7—Mo6—O10  | 102.16(19) | O8—Mo12—O10  | 98.2(2)    |
| O6—Mo6—O10  | 99.56(19)  | O9—Mo12—O10  | 105.0(2)   |
| O7—Mo6—O11  | 96.38(18)  | O12—Mo12—O10 | 143.76(16) |
| O6—Mo6—O11  | 158.86(17) | O8—Mo12—O13  | 164.37(18) |
| O10—Mo6—O11 | 78.71(15)  | O9—Mo12—O13  | 90.53(18)  |
| O7—Mo6—O5   | 165.79(17) | O12—Mo12—O13 | 78.21(15)  |
| O6—Mo6—O5   | 86.22(17)  | O10—Mo12—O13 | 77.56(15)  |
| O10—Mo6—O5  | 84.83(15)  | O8—Mo12—O11  | 95.39(18)  |
| O11—Mo6—O5  | 72.64(13)  | O9—Mo12—O11  | 159.45(17) |
| O27—Mo7—O16 | 105.5(2)   | O12—Mo12—O11 | 73.22(14)  |
| O27—Mo7—O21 | 102.08(19) | O10—Mo12—O11 | 73.12(14)  |
| O16—Mo7—O21 | 97.95(18)  | O13—Mo12—O11 | 68.99(12)  |
| O27—Mo7—O14 | 97.87(18)  | O30—Mo9—O19  | 77.50(15)  |
| O16—Mo7—O14 | 100.61(18) | O21—Mo9—O19  | 71.31(14)  |
| O21—Mo7—O14 | 147.92(16) | O26—Mo9—O15  | 87.96(18)  |
| O27—Mo7—O19 | 94.75(18)  | O22—Mo9—O15  | 167.72(17) |
| O16—Mo7—O19 | 159.46(18) | O30—Mo9—O15  | 71.43(15)  |
| O21—Mo7—O19 | 74.00(14)  | O21—Mo9—O15  | 77.85(15)  |

|             |            |              |            |
|-------------|------------|--------------|------------|
| O14—Mo7—O19 | 79.58(14)  | O19—Mo9—O15  | 82.40(13)  |
| O27—Mo7—O17 | 164.30(17) | O39—Mo10—O33 | 105.3(2)   |
| O16—Mo7—O17 | 88.57(17)  | O39—Mo10—O31 | 100.8(2)   |
| O21—Mo7—O17 | 82.38(15)  | O33—Mo10—O31 | 100.66(19) |
| O14—Mo7—O17 | 72.22(14)  | O39—Mo10—O30 | 100.1(2)   |
| O19—Mo7—O17 | 71.82(13)  | O33—Mo10—O30 | 96.90(19)  |
| O23—Mo8—O37 | 106.5(2)   | O31—Mo10—O30 | 147.93(15) |
| O23—Mo8—O32 | 109.7(2)   | O39—Mo10—O15 | 92.23(18)  |
| O37—Mo8—O32 | 107.6(2)   | O33—Mo10—O15 | 161.24(18) |
| O23—Mo8—O35 | 108.1(2)   | O31—Mo10—O15 | 82.07(15)  |
| O37—Mo8—O35 | 110.1(2)   | O30—Mo10—O15 | 73.08(15)  |
| O32—Mo8—O35 | 114.56(17) | O39—Mo10—O20 | 162.51(18) |
| O26—Mo9—O22 | 103.5(2)   | O33—Mo10—O20 | 91.72(18)  |
| O26—Mo9—O30 | 105.13(19) | O31—Mo10—O20 | 71.61(15)  |
| O22—Mo9—O30 | 100.90(18) | O30—Mo10—O20 | 81.30(15)  |
| O26—Mo9—O21 | 100.85(18) | O15—Mo10—O20 | 71.38(13)  |
| O22—Mo9—O21 | 103.78(19) | O26—Mo9—O19  | 168.65(18) |
| O30—Mo9—O21 | 138.52(16) | O22—Mo9—O19  | 86.60(17)  |

**Table S2** Polyhedral components of the octamolybdate isomers

| Isomers                                                 | Polyhedra                    | Graphical representation                                                             | Refs     |
|---------------------------------------------------------|------------------------------|--------------------------------------------------------------------------------------|----------|
| $\alpha$ -Mo <sub>8</sub> O <sub>26</sub> <sup>4-</sup> | 6 octahedra,<br>2 tetrahedra | 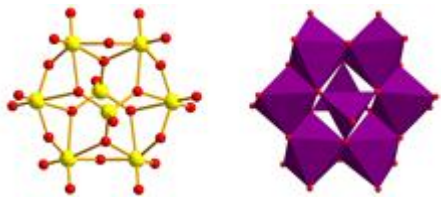 | 14       |
| $\beta$ -Mo <sub>8</sub> O <sub>26</sub> <sup>4-</sup>  | 8 octahedra                  |  | 15,16,17 |

|                                          |                                                    |                                                                                     |                                                                                      |            |
|------------------------------------------|----------------------------------------------------|-------------------------------------------------------------------------------------|--------------------------------------------------------------------------------------|------------|
| $\gamma\text{-Mo}_8\text{O}_{26}^{4-}$   | 6 octahedra,<br>2 square pyramids<br>(Type A)      | 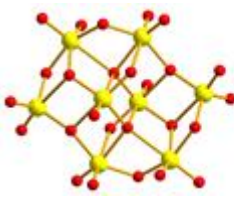   |    | 14,18,19   |
| $\delta\text{-Mo}_8\text{O}_{26}^{4-}$   | 4 octahedra,<br>4 tetrahedra                       |    |    | 20,21      |
| $\epsilon\text{-Mo}_8\text{O}_{26}^{4-}$ | 6 square pyramids,<br>2 octahedra                  |    |    | 21         |
| $\zeta\text{-Mo}_8\text{O}_{26}^{4-}$    | 4 octahedra,<br>4 square pyramids                  |   |   | 22         |
| $\eta\text{-Mo}_8\text{O}_{26}^{4-}$     | 6 octahedral,<br>2 square pyramids<br>(Type B)     |  |  | 5, 23      |
| $\theta\text{-Mo}_8\text{O}_{26}^{4-}$   | 4 octahedra,<br>2 square pyramids,<br>2 tetrahedra |  |  | 6          |
| $\iota\text{-Mo}_8\text{O}_{26}^{4-}$    | 5 octahedra,<br>3 tetrahedra                       |  |  | This paper |

---
